# Supplementary material for: Bistability in a Metabolic Network Underpins the De Novo Evolution of Colony Switching in Pseudomonas fluorescens
Source: PLoS Biol. 2015 Mar 12;13(3):e1002109. doi: 10.1371/journal.pbio.1002109 (PMC4357382; doi:10.1371/journal.pbio.1002109)
Supplement: S7 Data — (XLSX) [file pbio.1002109.s009.xlsx]

## Sheet: s3a_fig_SBW25
Medium: M9									Medium: M9+0.6 mM Arginine									Medium: M9+1 mM Uracil									Medium: M9+0.6 mM Arginine+1 mM Uracil
Time (hours)	replicate 1	replicate 2	replicate 3	replicate 4	replicate 5	average	se		Time (hours)	replicate 1	replicate 2	replicate 3	replicate 4	replicate 5	average	se		Time (hours)	replicate 1	replicate 2	replicate 3	replicate 4	replicate 5	average	se		Time (hours)	replicate 1	replicate 2	replicate 3	replicate 4	replicate 5	average	se
0	0.0516	0.0532	0.052	0.0511	0.0547	0.05252	0.000646065		0	0.0573	0.0577	0.0591	0.0583	0.0581	0.0581	0.000303315		0	0.0591	0.0592	0.0587	0.059	0.0634	0.05988	0.000883968		0	0.0553	0.0553	0.0551	0.0559	0.0555	0.05542	0.000135647
1	0.0512	0.0536	0.0522	0.0514	0.0546	0.0526	0.000654217		1	0.0575	0.0581	0.0612	0.0591	0.0583	0.05884	0.000643117		1	0.0596	0.0602	0.0592	0.0599	0.0601	0.0598	0.000181659		1	0.0556	0.0556	0.0553	0.0559	0.0559	0.05566	0.00011225
2	0.0513	0.0532	0.0524	0.0514	0.0553	0.05272	0.000733076		2	0.0575	0.0579	0.063	0.0693	0.0583	0.0612	0.00225655		2	0.0596	0.0602	0.0593	0.0598	0.0654	0.06086	0.00114438		2	0.0557	0.0557	0.0553	0.0561	0.0559	0.05574	0.000132665
3	0.0512	0.0534	0.0522	0.0514	0.055	0.05264	0.000705408		3	0.0576	0.0579	0.0628	0.0591	0.0583	0.05914	0.000948999		3	0.0598	0.0602	0.0594	0.0599	0.0636	0.06058	0.000765768		3	0.0558	0.0558	0.0554	0.0563	0.0561	0.05588	0.000152971
4	0.0514	0.0538	0.0523	0.0516	0.055	0.05282	0.000688767		4	0.0578	0.0581	0.0627	0.0591	0.0583	0.0592	0.00090111		4	0.0597	0.0603	0.0594	0.0598	0.0632	0.06048	0.00069527		4	0.0559	0.0559	0.0553	0.056	0.0559	0.0558	0.000126491
5	0.0513	0.0537	0.0524	0.0516	0.0552	0.05284	0.000721526		5	0.0579	0.0581	0.0631	0.0593	0.0584	0.05936	0.000965194		5	0.0598	0.0602	0.0595	0.0598	0.0638	0.06062	0.000802745		5	0.0561	0.0561	0.0555	0.0562	0.0562	0.05602	0.000131909
6	0.0516	0.0537	0.0525	0.0518	0.0554	0.053	0.000703562		6	0.0581	0.0581	0.0633	0.0594	0.0586	0.0595	0.000979285		6	0.06	0.0603	0.0597	0.0599	0.0639	0.06076	0.000790949		6	0.0562	0.0562	0.0556	0.0562	0.0563	0.0561	0.000126491
7	0.0516	0.0543	0.0528	0.052	0.0554	0.05322	0.000714423		7	0.0583	0.0585	0.0633	0.0597	0.0588	0.05972	0.000926499		7	0.0601	0.0605	0.0599	0.0601	0.0636	0.06084	0.00069685		7	0.0565	0.0565	0.0557	0.0565	0.0564	0.05632	0.000156205
8	0.0519	0.0541	0.0527	0.0521	0.0554	0.05324	0.000663023		8	0.059	0.059	0.0638	0.0602	0.0595	0.0603	0.000902219		8	0.0604	0.0608	0.0603	0.0605	0.0645	0.0613	0.000804363		8	0.0568	0.0568	0.0561	0.0567	0.0567	0.05662	0.000131909
9	0.0528	0.0546	0.0535	0.0526	0.0562	0.05394	0.00066453		9	0.0601	0.06	0.0646	0.061	0.0606	0.06126	0.000854166		9	0.0609	0.0611	0.0608	0.0614	0.0636	0.06156	0.000520192		9	0.0573	0.0573	0.0567	0.0576	0.0575	0.05728	0.000156205
10	0.0537	0.0555	0.0541	0.0533	0.0569	0.0547	0.000663325		10	0.0619	0.0613	0.0657	0.0623	0.0626	0.06276	0.000766551		10	0.0616	0.0619	0.0615	0.0623	0.0652	0.0625	0.000689202		10	0.0585	0.0585	0.0575	0.0583	0.0585	0.05826	0.000193907
11	0.0551	0.0566	0.0553	0.0543	0.0585	0.05596	0.000734575		11	0.0656	0.0644	0.0681	0.065	0.0662	0.06586	0.000635295		11	0.0632	0.0628	0.0628	0.0642	0.066	0.0638	0.00060663		11	0.0604	0.0604	0.0592	0.0603	0.0604	0.06014	0.000235797
12	0.0576	0.059	0.0578	0.0566	0.061	0.0584	0.000753658		12	0.0738	0.0706	0.0726	0.0705	0.075	0.0725	0.000882043		12	0.0652	0.0646	0.0646	0.0663	0.0661	0.06536	0.000361386		12	0.0641	0.0641	0.0624	0.0641	0.0639	0.06372	0.000332265
13	0.0618	0.0617	0.0617	0.0601	0.0648	0.06202	0.000763806		13	0.1022	0.0908	0.0853	0.0851	0.1021	0.0931	0.00383367		13	0.068	0.0671	0.0677	0.07	0.0702	0.0686	0.000630079		13	0.071	0.071	0.0686	0.0715	0.0727	0.07096	0.000666783
14	0.0696	0.0671	0.0673	0.0656	0.0724	0.0684	0.00118701		14	0.135	0.1228	0.1102	0.109	0.1307	0.12154	0.00525601		14	0.072	0.0704	0.0718	0.0752	0.0717	0.07222	0.000796492		14	0.0987	0.0987	0.0889	0.095	0.0952	0.0953	0.00179137
15	0.087	0.0783	0.0804	0.0767	0.0846	0.0814	0.00192743		15	0.1608	0.1502	0.1399	0.1358	0.1705	0.15144	0.00644287		15	0.0792	0.0753	0.0791	0.0858	0.0784	0.07956	0.00171423		15	0.1259	0.1259	0.116	0.1219	0.1229	0.12252	0.00181505
16	0.1207	0.1059	0.1023	0.0986	0.108	0.1071	0.00375832		16	0.1922	0.2105	0.1805	0.1851	0.2177	0.1972	0.00723685		16	0.0994	0.0887	0.0946	0.1107	0.0852	0.09572	0.00446737		16	0.1493	0.1493	0.1542	0.1643	0.1664	0.1567	0.003658
17	0.1406	0.1377	0.1357	0.1307	0.1407	0.13708	0.00185051		17	0.2144	0.2284	0.2262	0.2287	0.2414	0.22782	0.00429097		17	0.1298	0.1231	0.1287	0.1444	0.0999	0.12518	0.00723377		17	0.1974	0.1974	0.1909	0.2014	0.2034	0.1981	0.00214243
18	0.169	0.1681	0.1701	0.1662	0.1738	0.16944	0.00126357		18	0.2275	0.2458	0.2447	0.2439	0.2546	0.2433	0.00439261		18	0.1641	0.1551	0.1553	0.1689	0.1292	0.15452	0.00685787		18	0.2118	0.2118	0.2305	0.2387	0.2462	0.2278	0.00698806
19	0.1839	0.1885	0.1933	0.1873	0.1972	0.19004	0.00233957		19	0.2338	0.2587	0.261	0.2618	0.2706	0.25718	0.00618453		19	0.1896	0.1767	0.1805	0.1939	0.152	0.17854	0.00731386		19	0.2255	0.2255	0.2427	0.2524	0.2645	0.24212	0.00761357
20	0.1973	0.2112	0.2167	0.2108	0.2221	0.21162	0.00413248		20	0.2408	0.273	0.2737	0.2802	0.291	0.27174	0.00838222		20	0.2176	0.2017	0.2071	0.2226	0.1695	0.2037	0.00931563		20	0.2349	0.2349	0.2599	0.2698	0.2874	0.25738	0.0101797
21	0.2145	0.2338	0.2446	0.2374	0.2517	0.2364	0.00627973		21	0.2492	0.2877	0.2912	0.2995	0.3078	0.28708	0.0100892		21	0.252	0.2328	0.2407	0.256	0.1885	0.234	0.0120925		21	0.2444	0.2444	0.2791	0.2904	0.3111	0.27388	0.0130836
22	0.2258	0.2591	0.2743	0.2679	0.2858	0.26258	0.0101728		22	0.2634	0.3012	0.3128	0.313	0.3194	0.30196	0.0100772		22	0.2892	0.2672	0.2757	0.29	0.2087	0.26616	0.0149882		22	0.2537	0.2537	0.2996	0.3106	0.3344	0.2904	0.0160038
23	0.2442	0.2801	0.2994	0.2905	0.3146	0.28576	0.0118312		23	0.271	0.3124	0.3205	0.3295	0.3354	0.31376	0.0113836		23	0.3221	0.3013	0.3066	0.319	0.2358	0.29696	0.015764		23	0.2657	0.2657	0.316	0.3264	0.3545	0.30566	0.0174872
24	0.2614	0.3001	0.3202	0.3124	0.3356	0.30594	0.0125354		24	0.2799	0.3207	0.3315	0.3387	0.3453	0.32322	0.011573		24	0.3448	0.3263	0.3308	0.3427	0.2628	0.32148	0.015079		24	0.279	0.279	0.3298	0.3424	0.3713	0.3203	0.0181536
25	0.2775	0.313	0.3347	0.3299	0.3543	0.32188	0.0128999		25	0.2862	0.3302	0.3417	0.3481	0.3568	0.3326	0.0123843		25	0.3691	0.3472	0.3514	0.3622	0.2908	0.34414	0.0138859		25	0.2861	0.2861	0.3485	0.3633	0.3941	0.33562	0.0215133
26	0.2896	0.3271	0.3472	0.3449	0.37	0.33576	0.0134025		26	0.2899	0.3493	0.3564	0.3663	0.376	0.34758	0.0151094		26	0.3904	0.3704	0.3725	0.3832	0.3148	0.36626	0.0133677		26	0.293	0.293	0.3661	0.378	0.4042	0.34686	0.0228359
27	0.2968	0.3481	0.3646	0.3617	0.3886	0.35196	0.0152556		27	0.2946	0.3655	0.3704	0.3793	0.3861	0.35918	0.0165316		27	0.4031	0.3904	0.3884	0.3951	0.3376	0.38292	0.0116092		27	0.3068	0.3068	0.377	0.3858	0.4127	0.35782	0.0216433
28	0.3041	0.3638	0.3783	0.3786	0.3977	0.3645	0.0160314		28	0.3155	0.3731	0.3792	0.3861	0.3924	0.36926	0.0138252		28	0.4089	0.3999	0.3966	0.4016	0.3651	0.39442	0.00760154		28	0.3254	0.3254	0.3844	0.3944	0.4204	0.37	0.0191327
29	0.3175	0.3724	0.3865	0.3855	0.4034	0.37306	0.0147364		29	0.3272	0.3767	0.3854	0.3923	0.3982	0.37596	0.0127059		29	0.4231	0.4071	0.4047	0.4082	0.3802	0.40466	0.00691669		29	0.3301	0.3301	0.392	0.4019	0.4286	0.37654	0.0198818
30	0.3259	0.3735	0.3885	0.3884	0.4077	0.3768	0.0138347		30	0.3293	0.3805	0.3901	0.3994	0.4073	0.38132	0.0137581		30	0.4305	0.4154	0.4105	0.4153	0.3866	0.41166	0.00711172		30	0.3317	0.3317	0.3982	0.4069	0.433	0.3803	0.0206509
31	0.3307	0.3776	0.3926	0.3905	0.411	0.38048	0.0135372		31	0.3297	0.3831	0.3954	0.4046	0.4078	0.38412	0.0142653		31	0.4351	0.4213	0.4182	0.4226	0.3927	0.41798	0.00694474		31	0.3373	0.3373	0.4047	0.416	0.4382	0.3867	0.0208752
32	0.3282	0.3822	0.3967	0.3943	0.4182	0.38392	0.0150895		32	0.3227	0.3856	0.3987	0.4066	0.4133	0.38538	0.0163341		32	0.4433	0.4289	0.4253	0.4262	0.3981	0.42436	0.00732527		32	0.3313	0.3313	0.411	0.4193	0.4442	0.38742	0.0235534
33	0.3307	0.3855	0.3994	0.3988	0.4186	0.3866	0.0149377		33	0.3238	0.3884	0.4029	0.4115	0.419	0.38912	0.0171038		33	0.4453	0.4353	0.4302	0.432	0.4001	0.42858	0.00758336		33	0.3332	0.3332	0.4145	0.4244	0.4488	0.39082	0.0241766
34	0.3309	0.3872	0.4021	0.4002	0.4231	0.3887	0.0155536		34	0.3181	0.3896	0.4062	0.4135	0.4212	0.38972	0.0186514		34	0.4527	0.4416	0.4359	0.4375	0.4054	0.43462	0.00787194		34	0.3307	0.3307	0.4197	0.4295	0.4529	0.3927	0.0258798
35	0.332	0.3888	0.4037	0.4034	0.4233	0.39024	0.0155584		35	0.3191	0.3926	0.4096	0.4161	0.4234	0.39216	0.018962		35	0.4572	0.4505	0.4406	0.4409	0.409	0.43964	0.00826926		35	0.3297	0.3297	0.4224	0.4336	0.4562	0.39432	0.026937
36	0.3391	0.3894	0.405	0.4036	0.4267	0.39276	0.0146798		36	0.3261	0.396	0.4116	0.4191	0.4244	0.39544	0.0179833		36	0.456	0.4541	0.4431	0.4469	0.4155	0.44312	0.00729249		36	0.3381	0.3381	0.4242	0.4368	0.4576	0.39896	0.0254121
37	0.3422	0.3901	0.4064	0.4048	0.4261	0.39392	0.0141408		37	0.3275	0.3981	0.4127	0.4208	0.4263	0.39708	0.0180317		37	0.4521	0.4608	0.4466	0.4508	0.4171	0.44548	0.0074616		37	0.3407	0.3407	0.4271	0.4395	0.4589	0.40138	0.0252857
38	0.3412	0.3925	0.4077	0.4053	0.4274	0.39482	0.0145218		38	0.323	0.3965	0.4127	0.4209	0.431	0.39682	0.0193		38	0.4444	0.4712	0.4495	0.4556	0.4186	0.44786	0.00858916		38	0.3373	0.3373	0.4287	0.4417	0.4617	0.40134	0.0266675
39	0.3457	0.3913	0.407	0.4072	0.429	0.39604	0.013942		39	0.3272	0.3992	0.4141	0.4227	0.4286	0.39836	0.018465		39	0.4642	0.4789	0.4496	0.458	0.4224	0.45462	0.00937029		39	0.3427	0.3427	0.4294	0.4423	0.4618	0.40378	0.0254637
40	0.3447	0.3911	0.4073	0.4074	0.4279	0.39568	0.0140186		40	0.3261	0.399	0.4142	0.4247	0.4318	0.39916	0.0190809		40	0.4602	0.4862	0.4522	0.4585	0.4216	0.45574	0.0103281		40	0.3409	0.3409	0.4314	0.4446	0.4634	0.40424	0.0263538
41	0.3443	0.3909	0.4066	0.4081	0.4298	0.39594	0.014318		41	0.3223	0.3981	0.4149	0.4236	0.4332	0.39842	0.0198867		41	0.4566	0.4961	0.4535	0.461	0.4237	0.45818	0.0115307		41	0.3375	0.3375	0.4323	0.4452	0.4649	0.40348	0.027432
42	0.3471	0.3896	0.4061	0.4065	0.4299	0.39584	0.0137723		42	0.3216	0.3968	0.413	0.4231	0.4335	0.3976	0.019941		42	0.4666	0.5016	0.4537	0.4611	0.4232	0.46124	0.0125729		42	0.3381	0.3381	0.4315	0.4458	0.4654	0.40378	0.0273485
43	0.3502	0.3895	0.4056	0.408	0.4273	0.39612	0.0129531		43	0.3256	0.3983	0.4128	0.4236	0.4328	0.39862	0.0191381		43	0.4532	0.5088	0.4527	0.4633	0.4227	0.46014	0.0139339		43	0.3456	0.3456	0.4314	0.4464	0.4668	0.40716	0.0257522
44	0.3483	0.3885	0.4033	0.4032	0.4265	0.39396	0.0129347		44	0.3221	0.3963	0.4115	0.422	0.4329	0.39696	0.0196654		44	0.4602	0.5135	0.4531	0.4636	0.4243	0.46294	0.014412		44	0.3369	0.3369	0.432	0.4466	0.4677	0.40402	0.0279833
45	0.3509	0.388	0.4021	0.4027	0.4258	0.3939	0.0123412		45	0.3214	0.3946	0.4105	0.4218	0.433	0.39626	0.0197632		45	0.4527	0.5199	0.4523	0.4645	0.423	0.46248	0.0159045		45	0.3418	0.3418	0.4316	0.4464	0.4688	0.40608	0.0269022
46	0.3516	0.3868	0.4	0.4001	0.4245	0.3926	0.0119232		46	0.3204	0.3938	0.4083	0.4201	0.4327	0.39506	0.0197418		46	0.4623	0.512	0.4511	0.4578	0.4197	0.46058	0.0148589		46	0.3416	0.3416	0.4305	0.4453	0.467	0.4052	0.0266057
47	0.3552	0.3861	0.3981	0.3994	0.4223	0.39222	0.0109519		47	0.3228	0.3923	0.4061	0.4195	0.4303	0.3942	0.0189558		47	0.4606	0.5204	0.4494	0.4626	0.4234	0.46328	0.0158956		47	0.3448	0.3448	0.4291	0.4451	0.4648	0.40572	0.0255052
48	0.3552	0.3857	0.3965	0.3956	0.4203	0.39066	0.0105334		48	0.3195	0.3919	0.4044	0.4173	0.4304	0.3927	0.0193936		48	0.448	0.5272	0.4482	0.4551	0.4197	0.45964	0.0179535		48	0.3398	0.3398	0.4281	0.4434	0.4641	0.40304	0.0264423
49	0.3583	0.3845	0.3928	0.3931	0.4175	0.38924	0.0095025		49	0.3196	0.3902	0.4025	0.4157	0.4287	0.39134	0.0190547		49	0.4501	0.516	0.4451	0.4536	0.4174	0.45644	0.0161993		49	0.3413	0.3413	0.4266	0.4423	0.4623	0.40276	0.025721
50	0.3618	0.3833	0.3912	0.3892	0.4154	0.38818	0.00857557		50	0.3189	0.3871	0.3996	0.4136	0.4277	0.38938	0.018884		50	0.4403	0.5105	0.4423	0.4466	0.4148	0.4509	0.0159063		50	0.3435	0.3435	0.4244	0.4404	0.4598	0.40232	0.0246588

## Sheet: s3b_fig_1b4
Medium: M9									Medium: M9+0.6 mM Arginine									Medium: M9+1 mM Uracil									Medium: M9+0.6 mM Arginine+1 mM Uracil
Time (hours)	replicate 1	replicate 2	replicate 3	replicate 4	replicate 5	average	se		Time (hours)	replicate 1	replicate 2	replicate 3	replicate 4	replicate 5	average	se		Time (hours)	replicate 1	replicate 2	replicate 3	replicate 4	replicate 5	average	se		Time (hours)	replicate 1	replicate 2	replicate 3	replicate 4	replicate 5	average	se
0	0.0542	0.052	0.0577	0.0518	0.0575	0.05464	0.00128008		0	0.0561	0.0547	0.0575	0.0583	0.0563	0.05658	0.000618385		0	0.0595	0.0593	0.0579	0.0605	0.0586	0.05916	0.000437721		0	0.0551	0.0563	0.0564	0.0559	0.0561	0.05596	0.000231517
1	0.0535	0.0521	0.0521	0.0526	0.0569	0.05344	0.000901998		1	0.056	0.055	0.0574	0.0588	0.057	0.05684	0.000643117		1	0.0601	0.0599	0.0584	0.061	0.0594	0.05976	0.000427317		1	0.0555	0.0567	0.0568	0.0562	0.0561	0.05626	0.000233666
2	0.0594	0.0522	0.0519	0.0527	0.0568	0.0546	0.00149231		2	0.0563	0.0553	0.0574	0.0591	0.0573	0.05708	0.000632772		2	0.0605	0.0598	0.0585	0.0611	0.0593	0.05984	0.000453431		2	0.0556	0.0568	0.0576	0.0562	0.0563	0.0565	0.000334664
3	0.0542	0.052	0.0515	0.0526	0.057	0.05346	0.000994786		3	0.0564	0.0553	0.0574	0.059	0.0574	0.0571	0.000613188		3	0.0604	0.0598	0.0585	0.0613	0.0593	0.05986	0.000476025		3	0.0557	0.0569	0.0578	0.0562	0.0564	0.0566	0.000356371
4	0.0543	0.0522	0.0518	0.0526	0.0567	0.05352	0.000901887		4	0.0562	0.0552	0.0576	0.0591	0.0568	0.05698	0.00065909		4	0.0604	0.0601	0.0585	0.0614	0.0594	0.05996	0.000486415		4	0.0556	0.0567	0.0577	0.0561	0.0564	0.0565	0.000350714
5	0.0542	0.0521	0.052	0.0527	0.0569	0.05358	0.000918368		5	0.0564	0.0555	0.0577	0.059	0.057	0.05712	0.00059279		5	0.0603	0.0599	0.0583	0.0612	0.0592	0.05978	0.000491325		5	0.0559	0.0568	0.0579	0.0562	0.0565	0.05666	0.000344384
6	0.0545	0.0526	0.052	0.053	0.0565	0.05372	0.000808332		6	0.0563	0.0551	0.0576	0.0592	0.0572	0.05708	0.000682202		6	0.0603	0.06	0.0584	0.0612	0.0591	0.0598	0.000484768		6	0.0558	0.0568	0.058	0.0562	0.0567	0.0567	0.000371484
7	0.0544	0.0523	0.0519	0.053	0.0569	0.0537	0.000906091		7	0.0585	0.0555	0.0577	0.0593	0.0571	0.05762	0.000646838		7	0.0603	0.06	0.0584	0.0615	0.0594	0.05992	0.000511273		7	0.0559	0.0571	0.0581	0.0564	0.0567	0.05684	0.000370945
8	0.0542	0.0542	0.0524	0.0529	0.0569	0.05412	0.000780641		8	0.0566	0.0558	0.0578	0.0595	0.0572	0.05738	0.00062482		8	0.0603	0.0599	0.0584	0.0614	0.0594	0.05988	0.000495379		8	0.0562	0.0571	0.0585	0.0565	0.057	0.05706	0.000395727
9	0.0546	0.0523	0.0575	0.0531	0.0574	0.05498	0.00107396		9	0.0567	0.0558	0.058	0.0596	0.0573	0.05748	0.000641405		9	0.0604	0.06	0.0584	0.0614	0.0595	0.05994	0.00049558		9	0.0568	0.0575	0.059	0.0568	0.0573	0.05748	0.000404228
10	0.0546	0.0523	0.053	0.0532	0.0561	0.05384	0.0006772		10	0.057	0.0557	0.0583	0.06	0.0576	0.05772	0.00071232		10	0.0606	0.0598	0.0585	0.0616	0.0596	0.06002	0.000518073		10	0.0574	0.058	0.0596	0.0571	0.0582	0.05806	0.000433128
11	0.0545	0.0522	0.0602	0.0531	0.0574	0.05548	0.00147221		11	0.0573	0.0558	0.0586	0.0603	0.0581	0.05802	0.000741215		11	0.0606	0.0599	0.0585	0.0612	0.0597	0.05998	0.000455412		11	0.0587	0.0592	0.0608	0.0579	0.0593	0.05918	0.000474763
12	0.0547	0.0524	0.0542	0.0535	0.0583	0.05462	0.000997697		12	0.0577	0.0562	0.059	0.0608	0.058	0.05834	0.000761315		12	0.0606	0.0598	0.0585	0.0615	0.0598	0.06004	0.000496588		12	0.0609	0.061	0.0626	0.0594	0.0615	0.06108	0.000517107
13	0.0558	0.0524	0.0558	0.0532	0.0567	0.05478	0.000834506		13	0.058	0.0565	0.0598	0.0611	0.0584	0.05876	0.000786511		13	0.0605	0.0603	0.0587	0.0618	0.0598	0.06022	0.000503389		13	0.0644	0.064	0.0659	0.0618	0.0651	0.06424	0.000690362
14	0.0557	0.0525	0.0518	0.0535	0.056	0.0539	0.000842021		14	0.0585	0.0577	0.0606	0.0618	0.0593	0.05958	0.000733076		14	0.0606	0.06	0.0586	0.0617	0.0599	0.06016	0.000504579		14	0.0709	0.0684	0.0712	0.0655	0.0711	0.06942	0.00110878
15	0.056	0.0526	0.06	0.0533	0.0572	0.05582	0.00134402		15	0.0592	0.0588	0.0623	0.0625	0.0608	0.06072	0.000763806		15	0.0606	0.0601	0.0588	0.0619	0.0601	0.0603	0.000498999		15	0.0943	0.0846	0.0872	0.0728	0.0855	0.08488	0.00346777
16	0.0586	0.0528	0.0603	0.0535	0.0573	0.0565	0.00145224		16	0.0602	0.0599	0.0641	0.0635	0.0628	0.0621	0.000863134		16	0.0606	0.0601	0.0586	0.0619	0.0601	0.06026	0.000529717		16	0.1201	0.1056	0.1133	0.0957	0.1127	0.10948	0.00413937
17	0.0561	0.0527	0.054	0.0539	0.0563	0.0546	0.00069282		17	0.0621	0.0624	0.067	0.0659	0.0667	0.06482	0.00106555		17	0.0607	0.06	0.0588	0.0621	0.0603	0.06038	0.000534228		17	0.1375	0.1268	0.1325	0.1168	0.1315	0.12902	0.00349591
18	0.0551	0.0529	0.0556	0.0543	0.0568	0.05494	0.000651613		18	0.0644	0.0666	0.0726	0.0687	0.0768	0.06982	0.00220735		18	0.0604	0.0601	0.0587	0.0621	0.0603	0.06032	0.00054074		18	0.1636	0.1437	0.1448	0.1367	0.1492	0.1476	0.00447448
19	0.0565	0.0529	0.0538	0.054	0.0575	0.05494	0.000875557		19	0.0705	0.083	0.0846	0.0733	0.1041	0.0831	0.00590788		19	0.0605	0.0599	0.0588	0.062	0.0602	0.06028	0.000517107		19	0.2018	0.1569	0.157	0.1493	0.16	0.165	0.0093684
20	0.0569	0.0531	0.0524	0.0546	0.0593	0.05526	0.00127067		20	0.0851	0.1012	0.1002	0.084	0.1217	0.09844	0.00684913		20	0.0605	0.0599	0.0587	0.0615	0.0604	0.0602	0.00045607		20	0.2197	0.1796	0.1803	0.161	0.1863	0.18538	0.00957159
21	0.0572	0.0538	0.0527	0.0545	0.058	0.05524	0.00101321		21	0.103	0.1107	0.1231	0.0968	0.129	0.11252	0.00601909		21	0.0607	0.0603	0.059	0.0621	0.0607	0.06056	0.00049558		21	0.2337	0.2019	0.1949	0.1912	0.1933	0.203	0.00788239
22	0.0572	0.0539	0.0529	0.0548	0.0587	0.0555	0.00107098		22	0.1208	0.1326	0.1409	0.1221	0.1528	0.13384	0.00599471		22	0.0606	0.0602	0.059	0.0623	0.0609	0.0606	0.000533854		22	0.2446	0.2115	0.2015	0.1945	0.2016	0.21074	0.00888744
23	0.0579	0.0547	0.0534	0.0551	0.0597	0.05616	0.00114961		23	0.1309	0.1381	0.1514	0.1415	0.164	0.14518	0.0057466		23	0.0604	0.0602	0.059	0.0622	0.0607	0.0605	0.000513809		23	0.2524	0.2192	0.2078	0.2025	0.2085	0.21808	0.00899808
24	0.0583	0.0555	0.0541	0.0556	0.06	0.0567	0.00106911		24	0.142	0.1565	0.1706	0.1492	0.1734	0.15834	0.00604579		24	0.0607	0.0603	0.0593	0.063	0.061	0.06086	0.000607124		24	0.2658	0.2276	0.2166	0.2085	0.2181	0.22732	0.0100869
25	0.0593	0.0571	0.0555	0.0563	0.0624	0.05812	0.00124354		25	0.1595	0.167	0.1772	0.1709	0.1812	0.17116	0.0038119		25	0.0609	0.06	0.0591	0.0625	0.0611	0.06072	0.000569561		25	0.2713	0.2359	0.2248	0.2181	0.2271	0.23544	0.00940636
26	0.0602	0.0587	0.0571	0.0573	0.0709	0.06084	0.00257597		26	0.1687	0.1749	0.1851	0.1777	0.1879	0.17886	0.00347068		26	0.0608	0.0605	0.0596	0.0636	0.0616	0.06122	0.000675574		26	0.2724	0.2391	0.2236	0.2232	0.2273	0.23712	0.0092779
27	0.0617	0.0614	0.06	0.0589	0.0666	0.06172	0.00131962		27	0.1768	0.1819	0.1919	0.1865	0.1945	0.18632	0.00322683		27	0.0611	0.0602	0.0595	0.0631	0.0618	0.06114	0.000626578		27	0.2738	0.242	0.2274	0.2265	0.2339	0.24072	0.00872373
28	0.0638	0.0648	0.0638	0.0606	0.0706	0.06472	0.00163169		28	0.1852	0.1891	0.1984	0.1955	0.1991	0.19346	0.00271673		28	0.0612	0.0608	0.06	0.0642	0.0624	0.06172	0.000731027		28	0.276	0.2465	0.2305	0.2321	0.239	0.24482	0.00829382
29	0.0669	0.0717	0.0767	0.0639	0.0814	0.07212	0.00317874		29	0.1907	0.1965	0.2052	0.203	0.2039	0.19986	0.00273763		29	0.0615	0.061	0.0604	0.0651	0.063	0.0622	0.000843208		29	0.2779	0.2492	0.2338	0.2365	0.2442	0.24832	0.00788438
30	0.0717	0.0869	0.0829	0.0693	0.0978	0.08172	0.00520311		30	0.1977	0.2027	0.214	0.2101	0.2105	0.207	0.00296513		30	0.062	0.0611	0.0608	0.0652	0.0637	0.06256	0.000831023		30	0.2802	0.2512	0.2361	0.2403	0.2486	0.25128	0.00772835
31	0.079	0.1006	0.0985	0.0791	0.1124	0.09392	0.0065167		31	0.207	0.2118	0.2237	0.2183	0.2223	0.21662	0.00317008		31	0.0625	0.0613	0.0614	0.0665	0.0648	0.0633	0.00101833		31	0.2825	0.2541	0.2394	0.2441	0.2539	0.2548	0.00748412
32	0.0924	0.1192	0.1162	0.0925	0.125	0.10906	0.00692702		32	0.2132	0.2187	0.2254	0.2287	0.2282	0.22284	0.00299743		32	0.0631	0.0618	0.0623	0.0681	0.0661	0.06428	0.00121178		32	0.2847	0.2567	0.242	0.2478	0.2573	0.2577	0.00733028
33	0.1104	0.1336	0.1249	0.113	0.1338	0.12314	0.00495617		33	0.2163	0.2226	0.229	0.2309	0.2321	0.22618	0.00296402		33	0.0635	0.063	0.0636	0.0716	0.0677	0.06588	0.00166114		33	0.2878	0.2605	0.2443	0.2508	0.2609	0.26086	0.00742069
34	0.1255	0.1492	0.1395	0.1248	0.1463	0.13706	0.00511201		34	0.2197	0.2274	0.2338	0.2347	0.2372	0.23056	0.00315953		34	0.0646	0.0629	0.0645	0.0725	0.0701	0.06692	0.00185267		34	0.2895	0.2635	0.248	0.2546	0.2651	0.26414	0.00705681
35	0.1394	0.1659	0.1536	0.1346	0.1621	0.15112	0.00614584		35	0.2255	0.2328	0.2387	0.2417	0.2433	0.2364	0.00326159		35	0.066	0.0641	0.0668	0.0758	0.074	0.06934	0.00232929		35	0.2921	0.2677	0.2508	0.258	0.2693	0.26758	0.00699124
36	0.1533	0.1862	0.1688	0.1456	0.1762	0.16602	0.00740732		36	0.2308	0.2377	0.2449	0.2432	0.2453	0.24038	0.00275271		36	0.068	0.066	0.0702	0.0805	0.0795	0.07284	0.00300177		36	0.2949	0.2703	0.2539	0.2607	0.2728	0.27052	0.0069724
37	0.1662	0.2015	0.1855	0.1603	0.1939	0.18148	0.00791608		37	0.2337	0.2415	0.2473	0.25	0.2528	0.24506	0.00339891		37	0.0719	0.0685	0.0746	0.0844	0.0878	0.07744	0.0037044		37	0.2969	0.2735	0.256	0.2634	0.2762	0.2732	0.0069378
38	0.1799	0.2186	0.1994	0.1748	0.208	0.19614	0.00829118		38	0.237	0.245	0.2512	0.2557	0.2567	0.24912	0.00366707		38	0.0777	0.0756	0.0793	0.0879	0.099	0.0839	0.00431567		38	0.2989	0.2762	0.2585	0.2662	0.2793	0.27582	0.00684642
39	0.194	0.2387	0.2126	0.1898	0.2216	0.21134	0.0090002		39	0.2422	0.2495	0.2551	0.2587	0.2614	0.25338	0.0034324		39	0.0806	0.0791	0.0853	0.0951	0.1084	0.0897	0.00544693		39	0.301	0.2791	0.2607	0.2688	0.2827	0.27846	0.00683803
40	0.2065	0.2635	0.2238	0.2065	0.2336	0.22678	0.0105506		40	0.2486	0.2537	0.2596	0.2642	0.2615	0.25752	0.00281911		40	0.0867	0.0843	0.0933	0.1027	0.1168	0.09676	0.00593848		40	0.3026	0.2812	0.2635	0.2714	0.2854	0.28082	0.00664909
41	0.2154	0.2774	0.2356	0.2136	0.244	0.2372	0.0116126		41	0.2529	0.2564	0.2627	0.2677	0.2659	0.26112	0.00281503		41	0.0937	0.0917	0.0999	0.1109	0.1257	0.10438	0.00629273		41	0.3045	0.2834	0.2648	0.273	0.2886	0.28286	0.00680041
42	0.2261	0.307	0.2444	0.2275	0.2529	0.25158	0.0147542		42	0.2525	0.2608	0.2668	0.2728	0.2667	0.26392	0.00342803		42	0.0998	0.0987	0.1071	0.1201	0.1349	0.11212	0.00685452		42	0.3059	0.2859	0.267	0.2756	0.2904	0.28496	0.00662998
43	0.2327	0.3278	0.2507	0.2356	0.2586	0.26108	0.0173495		43	0.26	0.2628	0.2696	0.2761	0.2703	0.26776	0.00286541		43	0.1068	0.1057	0.1142	0.1289	0.145	0.12012	0.00747164		43	0.3076	0.2873	0.2684	0.277	0.2925	0.28656	0.00670706
44	0.2466	0.3608	0.2555	0.2469	0.2635	0.27466	0.0217597		44	0.2637	0.2667	0.273	0.2783	0.2719	0.27072	0.00254448		44	0.1152	0.1133	0.1218	0.1373	0.1547	0.12846	0.00779965		44	0.3091	0.2891	0.2705	0.2789	0.2942	0.28836	0.00660784
45	0.2523	0.382	0.2583	0.251	0.27	0.28272	0.0250461		45	0.266	0.2687	0.2752	0.2808	0.2751	0.27316	0.00262156		45	0.1231	0.1207	0.13	0.1452	0.1644	0.13668	0.0081406		45	0.311	0.2909	0.2718	0.2807	0.2964	0.29016	0.00670959
46	0.2587	0.4086	0.2626	0.251	0.2725	0.29068	0.0296828		46	0.27	0.2733	0.278	0.2843	0.2762	0.27636	0.00240387		46	0.1308	0.13	0.1385	0.1526	0.1729	0.14496	0.00807791		46	0.3122	0.293	0.2731	0.2842	0.2981	0.29212	0.00657354
47	0.2624	0.4283	0.267	0.2563	0.2786	0.29852	0.0326499		47	0.2718	0.2736	0.2803	0.2891	0.2778	0.27852	0.00304128		47	0.1392	0.1372	0.1465	0.1594	0.1817	0.1528	0.00820603		47	0.3136	0.2937	0.2747	0.305	0.3218	0.30176	0.00821429
48	0.2663	0.4367	0.2715	0.2594	0.2802	0.30282	0.0336418		48	0.2738	0.2765	0.2819	0.2933	0.2796	0.28102	0.00336265		48	0.1468	0.1462	0.1552	0.1651	0.1909	0.16084	0.00826139		48	0.3146	0.2954	0.2872	0.3113	0.3294	0.30758	0.00742606
49	0.2712	0.4396	0.2756	0.2638	0.2849	0.30702	0.0333204		49	0.2763	0.2779	0.2833	0.2939	0.2778	0.28184	0.00324123		49	0.1547	0.1535	0.164	0.1684	0.1984	0.1678	0.00814635		49	0.3159	0.309	0.3008	0.3103	0.3291	0.31302	0.00468907
50	0.2766	0.458	0.2784	0.2676	0.2885	0.31382	0.0361975		50	0.2792	0.2788	0.2841	0.2936	0.2758	0.2823	0.00312282		50	0.1601	0.1613	0.1705	0.1726	0.2019	0.17328	0.00756481		50	0.3187	0.3231	0.3026	0.3074	0.3265	0.31566	0.00458744
